# Supplementary material
Source: publisher figshare collection journal article supplement (https://gsajournals.figshare.com/ndownloader/files/27242492)
Supplement: Supplementary file 1 [file 27242492]

## Sheet: TableS2_dominanceEffects
Table S2. Dominance effect of each QTL on each Procrustes coordinate estimated from multivariate multiple-QTL mapping.
coord_1	coord_2	coord_3	coord_4	coord_5	coord_6	coord_7	coord_8	coord_9	coord_10	coord_11	coord_12	coord_13	coord_14	coord_15	coord_16	coord_17	coord_18	coord_19	coord_20	coord_21	coord_22	coord_23	coord_24	coord_25	coord_26	coord_27	coord_28	coord_29	coord_30	coord_31	coord_32
1@4.0	-0.000870956	3.97e-05	-0.000503787	0.000544785	0.00057564	0.000124308	-0.000681176	-0.000234936	-0.000370571	-0.000341448	-0.000243904	0.000361189	0.00036654	0.000579265	-0.000199941	-0.000269147	0.000686329	0.000722234	0.000576279	-0.000392036	-0.0010988	0.000212469	0.000301695	-0.000491701	0.000485367	-0.000133026	-0.000126468	-0.000481819	-0.000186735	-0.00027787	0.00129049	3.81e-05
1@36.4	2.91e-07	0.000296639	-0.00030781	-0.000225553	8.52e-05	-5.3e-05	4.96e-06	0.000396852	-0.000140018	0.000533961	-0.000336053	0.000467993	0.000790981	0.0003807	-6.39e-06	0.000231299	0.000301955	-0.00097342	0.000199059	-0.000988536	-0.000252064	-0.000105709	0.0010309	0.000255007	-0.000507009	0.000192568	-0.000636553	-0.000598379	0.000214938	-1.27e-05	-0.000442432	0.000202298
2@22.7	-0.000220192	0.000420428	0.0011867	-0.000107861	-0.00037599	0.000367373	0.00126422	-0.000412686	0.000359249	-0.00012584	-0.000259756	0.000504142	5.69e-05	-0.00029657	-0.000645492	0.00026573	0.000339694	-0.000674086	-0.000122132	-0.00082378	-0.000110745	0.000673777	-0.00115128	6.91e-05	-0.00014973	0.000186805	-0.000677184	-0.000224365	0.0001261	-5.07e-05	0.000379664	0.000228528
2@44.4	0.000471222	0.000933651	-0.000768455	-0.000492982	-4.54e-05	-0.000340857	0.000332199	-8.67e-05	0.00023394	-0.000118586	0.000288361	-0.00073511	0.000535848	0.000380363	0.000797577	-0.000242774	-0.000961523	0.000101032	-0.00147459	0.000330594	0.000883105	0.000217484	-0.00137803	-0.00038076	-0.000297596	-2.57e-05	0.00125011	0.000254564	0.000263725	0.000650029	-0.000130528	-0.000444283
2@70.1	-0.000886151	-0.00107615	-0.0010641	4.69e-05	-0.000320039	-0.00058178	-0.000267429	-9.97e-05	9.3e-05	0.000138547	-0.000665008	-0.000316255	-0.000663672	0.000223408	-0.000422268	-7.88e-05	0.000203738	0.000383248	0.00112155	0.000168191	-0.00225849	3.77e-05	0.00273633	0.000586955	0.000649014	0.000771847	0.000270998	0.000286332	-0.000192898	0.000333211	0.00166545	-0.000823629
2@80.1	0.000970404	0.000681892	0.00107415	-0.000195916	-0.000141073	-7.19e-05	0.000715035	0.000674445	-0.000186871	0.000796755	0.000681217	0.000166144	0.000237895	-0.000461711	0.000100901	-4.49e-05	-8.29e-05	-0.000305561	-0.000999676	-0.00060601	0.00310127	-0.000379433	-0.00260145	-3.31e-05	-0.000591478	-0.000535069	-0.000512233	-0.000641984	0.000206662	-0.000133463	-0.00197185	0.00108972
3@30.0	0.00023482	1.44e-05	-0.00111337	0.000513968	-0.000406554	-4.01e-05	0.00137727	0.000630322	0.000578353	0.000435269	-0.000602694	-0.000341536	0.000930103	-0.000520483	-0.000679889	-0.000522245	0.000741794	-3.74e-05	1.96e-05	-0.00033547	-0.00135818	0.000122152	-0.000625993	5.72e-05	-0.000502648	-0.000187602	0.000319266	0.000515778	0.000698775	6.99e-05	0.000389338	-0.000374237
3@53.5	0.000517463	0.000333699	0.00158393	-0.000656983	-0.000104231	0.000255009	-0.00034708	-0.000414389	5.59e-05	-0.000356419	-0.000831052	-0.000267431	-0.000163684	-0.000146149	-0.000125517	-3.86e-05	9.37e-05	0.000588621	0.000587179	0.000470483	7.05e-05	0.000287401	0.000585322	9.18e-05	-0.000361253	0.000250892	-0.000934889	-0.000472437	-1.66e-06	-0.000125279	-0.000624668	0.000199835
4@2.9	4.59e-05	-0.000376355	-0.000896162	0.000131215	0.000337135	-0.000391191	0.00109492	-0.000123721	0.00140369	1.34e-05	-0.00159943	-0.000391049	-0.000660318	-0.000109086	-0.00144337	-0.0010973	-0.000192669	0.00129657	7.27e-05	-5.32e-05	0.000762391	0.00084477	0.000374781	0.000254443	-0.000202553	0.000663462	0.000806821	0.000306444	-6.6e-05	-0.000295665	0.000162091	-0.000672818
4@44.9	0.00111202	0.000875608	0.000137497	0.000197754	-0.000142422	0.000207434	0.000134858	-0.000119856	-0.000586022	-0.00013226	0.00166758	0.000171215	0.000636072	-0.000209709	0.00105285	0.00066814	-0.000645425	-0.000713903	-0.000983032	-0.000465525	2.21e-05	-0.000682796	-0.00110666	-4.37e-05	-0.000337739	0.000160957	-0.000443996	0.000129355	-0.000259332	-4.62e-05	-0.000258307	3.49e-06
4@60.5	-0.000177399	-0.000275816	0.000294298	-0.000241304	1.05e-05	-2.58e-05	-0.000201853	-8.6e-05	0.000579097	-6.96e-05	-0.000941925	-3.8e-05	-0.00101751	0.000330707	-0.000863755	-4.14e-07	0.000383806	0.00114957	0.00185118	-0.000808302	-0.000267544	0.000384785	0.00133854	0.000250531	9.46e-06	0.000100272	-0.000937953	-0.000308615	0.000200938	-0.000185624	-0.000259923	-0.000176426
5@57.5	0.000226483	-0.000107132	0.000559445	0.000168896	0.000699185	0.000194714	0.000916358	-0.000701494	-0.00017578	-0.000295027	-0.000733137	-0.000268717	-0.000321389	-0.00028611	-0.000564253	-0.00062198	-0.000525128	0.000942019	0.000646003	0.000962556	0.000326923	-0.000215804	-0.00136364	-0.000331148	0.000103718	0.000385343	-0.000860941	-1.56e-05	-4.16e-05	-0.000465164	0.00110772	0.000654625
6@37.9	-0.000522865	-7.1e-05	0.000167845	0.000240515	-0.000218463	-0.000218186	0.000162556	0.000112395	-8.05e-05	0.000578108	0.000583621	0.000335536	0.000526133	2.38e-05	0.000734686	-4.3e-06	-0.00040458	-0.000370541	-0.000161378	-0.00089631	-0.00128528	-0.000559917	0.00054562	0.000420692	-0.000252614	3.29e-05	5.06e-07	0.00013175	0.000177734	0.000396929	2.69e-05	-0.000152415
7@33.3	-0.000579291	2.45e-05	-0.000149906	0.000236245	-0.000153771	0.000303977	0.000314912	0.000440655	0.000240368	0.000524921	0.000561396	0.000617996	5.88e-05	0.000378092	0.000215994	0.000141349	0.000642931	-0.000441469	0.000845586	-0.00114334	-0.00178835	-0.00105693	0.00051794	-0.000118266	2.65e-05	-6.43e-05	-0.000765877	-0.00036368	0.000277	0.000408912	-0.000264286	0.000111274
7@50.5	4.7e-05	0.00016867	0.000828672	-0.000220818	-0.000210132	-3.2e-06	0.000163296	-9.75e-05	0.000318664	-0.000784813	-0.000235646	-8.78e-05	0.000347498	-0.000226223	-0.000789452	0.000199574	-9.83e-05	-0.000227994	-0.000146075	0.000257878	0.000920729	0.000972157	-0.00191185	-0.000147531	0.000186422	-0.000354567	0.000110343	0.000257283	0.000248206	-0.000198577	0.000220595	0.000493407
9@29.8	0.000572066	0.00111272	-0.000632792	0.000160329	1.64e-05	0.000297963	0.00138987	7.48e-05	0.000742679	0.000490472	0.000597638	8.16e-05	5.17e-05	-0.000232272	-0.000413646	0.000341995	0.000680295	-0.000475406	-0.000247874	-0.000512563	-0.000237777	-0.000443274	-0.00132956	-0.00049453	-0.000171652	0.000119946	-0.000608855	-0.000233559	0.0006434	0.000424761	-0.00105185	-0.000712989
10@7.0	-0.000393088	-0.000584429	0.000278735	-2.44e-05	0.000183153	3.37e-05	-0.00075535	-8.03e-05	-0.000131087	-1.51e-05	-0.000587802	-0.000146062	0.000141419	6.31e-05	-0.000255364	0.00011901	-6.81e-05	0.000133905	-0.000188405	0.000344425	-3.86e-05	-5.52e-05	0.00258252	0.000516633	-0.000122273	-0.000117958	-0.000132333	4.69e-06	-0.000480813	-0.000335337	-3.26e-05	0.000143339
10@51.1	-0.000552245	-0.000215989	0.00026905	-2.12e-06	0.000249104	-8.04e-05	0.000351483	-0.00051189	-9.27e-05	-0.000803244	-0.00110117	2.1e-05	-0.000577266	0.000296526	-0.000356299	-0.000406658	0.000318267	0.000329176	0.000823987	0.000654169	7.74e-05	0.000767845	-0.00137687	-0.000264965	7.89e-05	-5.09e-05	-0.00020653	-8.93e-05	0.000780631	0.000196759	0.00131429	0.000159997
11@31.0	0.00066644	0.000723013	0.000353541	0.000139249	0.000100178	0.000570835	3.79e-05	5.79e-05	-2.59e-05	-4.76e-05	0.000307011	0.00062577	0.00108073	-0.000524094	0.00057716	-0.000137703	0.000886301	0.000317531	-0.000195611	-0.000850288	-0.00238767	-0.00105739	0.00040713	0.000554288	0.000391339	0.000176933	-0.000544296	-0.000193285	-0.000934834	-0.000680241	-0.000719377	0.000325129
11@59.6	0.00114525	-6.7e-05	-0.000340391	0.00014734	0.000247931	4.82e-05	-2.63e-05	-0.000375584	-1.89e-05	-3.44e-05	-0.00104072	-0.00111308	6.76e-05	6.66e-05	-0.000519394	-0.00055856	-0.000432964	0.000796208	0.000294652	0.000897672	0.00179047	0.00108279	-0.00118738	-0.000115872	-0.000111131	-0.000355052	-0.000729407	-0.000579015	0.000918138	0.000179468	-5.75e-05	-1.98e-05
12@43.3	-0.000270108	-8.48e-05	0.000924268	-0.000179496	6.88e-05	0.000173255	-0.000670808	0.000121611	-0.000793998	0.000133537	9.62e-05	7.81e-05	4.55e-05	-0.00013811	0.000655134	5.28e-05	-0.000495853	0.000557719	0.000418479	-0.000285407	0.000416189	-0.000130211	0.000109527	-0.000288256	-0.000120305	4.44e-05	-0.000328602	-0.000510987	-0.000471332	-0.000466896	0.000416948	0.000922748
13@38.2	0.000277748	0.000484533	-0.000349771	-0.00042888	-0.000627907	-0.000522134	0.000529806	0.000378146	-0.000587786	0.000127011	9.55e-05	7.94e-05	0.000434958	0.000409532	0.000235264	0.000244902	-0.000139409	-0.000952544	-0.000889315	0.00013859	0.00125897	-0.000139545	0.000129558	2.6e-07	-0.00126405	0.000101327	0.000656785	0.000165383	0.000698687	0.000469692	-0.000459083	-0.000555716
14@11.9	-0.000170467	0.000709802	0.000239696	-0.000249137	-0.000350769	3.41e-05	0.00010465	0.000646107	-0.00081161	0.000479741	0.000244901	0.000685827	0.000958205	0.000483894	0.000316873	0.00099789	6.4e-05	-0.00145257	3.6e-05	-0.00037217	0.000700083	-0.000723464	0.000489885	-0.000545485	-0.000243048	-0.000861811	-0.000745671	-0.000519453	0.000290076	0.000306863	-0.00112274	0.000379829
14@54.7	0.000176702	0.000902406	-0.000173257	0.000196243	-0.000347814	7.01e-05	0.00127709	-1.5e-05	-0.000514808	8.94e-05	0.00116311	0.000528802	0.000668099	-0.000243678	0.00119987	0.000215879	-0.000881605	-0.000677163	-0.00120528	-0.00058367	-0.000155145	-0.000173983	-0.00079477	-0.000447327	-0.000230526	-0.000335092	0.00025626	-0.000228647	0.000775667	0.000801755	-0.0012136	-0.000100057
15@1.3	6.68e-05	0.000336328	0.000261982	-0.000351348	-1.56e-05	-0.000680294	0.00025472	-0.000849079	-0.000436953	-6.03e-06	-0.000223857	-1.81e-05	-0.000106977	0.00024712	-0.000284222	0.000624442	-0.00113331	0.000721477	0.00130244	0.00037266	0.000386914	-8.55e-05	-0.000682152	-0.000629985	0.000940538	1.91e-06	0.000133775	5.72e-05	-0.000155184	3.06e-05	-0.000308923	0.000228585
15@52.4	-9.16e-06	0.000249381	0.000759685	-0.000425473	-0.000207921	-0.000302673	-0.000299238	-0.000156659	-0.000465573	-0.000294586	0.000163772	0.00054062	0.000329269	-2.21e-05	-0.000137156	0.000166948	0.000719359	-0.000354512	-0.000646626	-0.00019547	9.56e-06	0.000264961	0.000443182	0.000163148	1.63e-05	0.000217412	-0.000680453	-0.000233882	0.000231297	0.000132379	-0.000226332	0.000250467
16@23.9	-0.000142061	-2.16e-05	0.000449424	-3.81e-05	-0.000119018	0.000364522	0.00167546	-5.62e-05	0.000404821	-0.000133347	-0.000793038	0.000263624	0.000429568	9.79e-05	-0.000606525	-7.18e-05	0.00017835	-0.000325596	0.00049603	-0.000463786	-0.00115464	-0.000528653	7.84e-05	0.000362872	-0.000946488	-2.57e-05	0.000401324	0.000153148	-0.000151907	0.000105932	-0.000199745	0.000316762
17@2.6	-0.000507588	0.000277644	-0.000298692	-0.000413907	0.000250247	-0.000467596	-0.000627657	-0.000196571	-0.000270393	-0.000141592	0.00134169	0.000730826	5.3e-05	0.000335909	0.0014251	0.000609024	0.000506921	-0.000310426	8.84e-05	-0.00101856	-0.00244227	-0.000754071	-0.000187281	-0.000152522	-0.000112857	0.000482471	0.00131897	0.000883216	-0.000235293	0.000614166	-0.000302287	-0.000478025
17@16.5	0.000993633	0.00024285	0.000763929	0.00010568	-6.76e-05	0.000528883	0.000245908	0.000212965	0.000479138	-0.000135874	-0.000147721	-0.000668765	0.000738917	-7.48e-05	-0.000319573	6.77e-05	-0.00041391	3.43e-05	-0.000500438	-0.000385416	0.000370181	-0.000186168	-6.31e-05	0.000512811	0.000272702	8.21e-06	-0.00104083	-9.7e-05	-0.000477466	-0.000659643	-0.000833825	0.000494144
